# Supplementary material for: Machine learning to predict plasma-based CO2 conversion in dielectric barrier discharge reactors
Source: Royal Society of Chemistry journal article supplement (doi:10.1039/d6gc01077f), 2026-05-14
Supplement: d6gc01077f1.pdf [file d6gc01077f1.pdf]

## Supplementary Information

### Machine learning to predict plasma-based CO<sub>2</sub> conversion in dielectric barrier discharges

Jiayin Li<sup>1, 2</sup>, Xinpei Lu<sup>3</sup>, Pranav Arun<sup>4</sup>, Jing Xu<sup>5</sup>, Fausto Gallucci<sup>4</sup>, Sirui Li<sup>4,\*</sup>, and Annemie Bogaerts<sup>1, 2,\*</sup>

<sup>1</sup> Research Group PLASMANT and Center of Excellence PLASMA, University of Antwerp, Department of Chemistry, Antwerp, 2610, Belgium

<sup>2</sup> Electrification Institute, University of Antwerp, Olieweg 97, 2020 Antwerp, Belgium.

<sup>3</sup> School of Electrical and Electronic Engineering, Huazhong University of Science and Technology, Wuhan, Hubei 430074, China

<sup>4</sup> Department of Chemical Engineering and Chemistry, Eindhoven University of Technology, Eindhoven 5612 AZ, the Netherlands

<sup>5</sup> School of Electronic Information and Communications, Huazhong University of Science and Technology, Wuhan, Hubei, 430074, People's Republic of China

Corresponding author: [S.Li1@tue.nl](mailto:S.Li1@tue.nl) (S. Li), [annemie.bogaerts@uantwerpen.be](mailto:annemie.bogaerts@uantwerpen.be) (A. Bogaerts)

## **Contents**

|                                                               |    |
|---------------------------------------------------------------|----|
| S1. List of all abbreviations in the paper.....               | 3  |
| S2. Database for the ML model development.....                | 4  |
| S3. Hyperparameters optimization - Bayesian Optimization..... | 12 |
| S4. Training curves of supervised learning models .....       | 13 |
| S5. Experimental setup.....                                   | 15 |
| S6. References .....                                          | 16 |

## S1. List of all abbreviations in the paper

Table S1. List of all abbreviations used in the paper

| <b>Full name</b>                                  | <b>Abbreviation</b> |
|---------------------------------------------------|---------------------|
| Carbon dioxide                                    | CO <sub>2</sub>     |
| Non-thermal plasma                                | NTP                 |
| Power-to-X                                        | P2X                 |
| Dielectric barrier discharge                      | DBD                 |
| Energy efficiency                                 | EE                  |
| Machine learning                                  | ML                  |
| Supervised learning                               | SL                  |
| Unsupervised learning                             | UL                  |
| Reinforcement learning                            | RL                  |
| Active learning                                   | AL                  |
| Artificial neural network                         | ANN                 |
| Dry reforming of methane                          | DRM                 |
| Backpropagation                                   | BP                  |
| Coefficient of determination                      | R <sup>2</sup>      |
| Bayesian optimization                             | BO                  |
| Specific energy input                             | SEI                 |
| Explainable artificial intelligence               | XAI                 |
| SHapley Additive exPlanations                     | SHAP                |
| Pearson's correlation coefficient                 | PCC                 |
| Physics-informed neural network                   | PINN                |
| Random Forest                                     | RF                  |
| Xtreme Gradient Boost                             | XGB                 |
| Mean square error                                 | MSE                 |
| Cross-Validation                                  | CV                  |
| Mean-absolute error                               | MAE                 |
| Root mean square error                            | RMSE                |
| Findable, Accessible, Interoperable, and Reusable | FAIR                |

## S2. Database for the ML model development

Table S2. Literature datasets for the plasma-based CO<sub>2</sub> splitting process

| No. | Power (W) | Flow rate (mL/min) | Discharge gap (mm) | Reactor length (mm) | Frequency (kHz) | Dielectric constant <sup>1</sup> | CO <sub>2</sub> conversion (%) | Energy efficiency (%) | Ref.              |
|-----|-----------|--------------------|--------------------|---------------------|-----------------|----------------------------------|--------------------------------|-----------------------|-------------------|
| 1   | 100       | 50                 | 2                  | 9                   | 10              | 4                                | 24.43                          | 2.38                  | Ref. <sup>2</sup> |
| 2   | 150       | 50                 | 2                  | 9                   | 10              | 4                                | 24.91                          | 1.618                 |                   |
| 3   | 100       | 50                 | 2                  | 9                   | 30              | 4                                | 21.9                           | 2.13                  |                   |
| 4   | 150       | 50                 | 2                  | 9                   | 30              | 4                                | 25.81                          | 1.67                  |                   |
| 5   | 200       | 50                 | 2                  | 9                   | 30              | 4                                | 27.25                          | 1.32                  |                   |
| 6   | 100       | 50                 | 2                  | 9                   | 60              | 4                                | 21.12                          | 2.05                  |                   |
| 7   | 150       | 50                 | 2                  | 9                   | 60              | 4                                | 25.58                          | 1.66                  |                   |
| 8   | 200       | 50                 | 2                  | 9                   | 60              | 4                                | 30.04                          | 1.46                  |                   |
| 9   | 150       | 50                 | 2                  | 9                   | 90              | 4                                | 23.38                          | 1.52                  |                   |
| 10  | 200       | 50                 | 2                  | 9                   | 90              | 4                                | 24.35                          | 1.18                  |                   |
| 11  | 21.6      | 40                 | 2                  | 7.5                 | 13              | 10                               | 6.8                            | 2.45                  | Ref. <sup>3</sup> |
| 12  | 21.6      | 40                 | 2                  | 11.2                | 13              | 10                               | 6.8                            | 2.45                  |                   |
| 13  | 21.6      | 40                 | 2                  | 15                  | 13              | 10                               | 6.8                            | 2.45                  |                   |
| 14  | 23.8      | 40                 | 2                  | 7.5                 | 13              | 10                               | 7.5                            | 2.45                  |                   |
| 15  | 23.8      | 40                 | 2                  | 11.2                | 13              | 10                               | 8.1                            | 2.65                  |                   |
| 16  | 23.8      | 40                 | 2                  | 15                  | 13              | 10                               | 9                              | 2.94                  |                   |
| 17  | 26.5      | 40                 | 2                  | 7.5                 | 13              | 10                               | 9.3                            | 2.73                  |                   |
| 18  | 26.5      | 40                 | 2                  | 11.2                | 13              | 10                               | 9.9                            | 2.91                  |                   |
| 19  | 26.5      | 40                 | 2                  | 15                  | 13              | 10                               | 10.2                           | 2.99                  |                   |
| 20  | 30.3      | 40                 | 2                  | 7.5                 | 13              | 10                               | 11.4                           | 2.93                  |                   |
| 21  | 30.3      | 40                 | 2                  | 11.2                | 13              | 10                               | 11.7                           | 3.00                  |                   |
| 22  | 30.3      | 40                 | 2                  | 15                  | 13              | 10                               | 11.5                           | 2.95                  |                   |
| 23  | 35.3      | 40                 | 2                  | 7.5                 | 13              | 10                               | 12.6                           | 2.78                  |                   |
| 24  | 35.3      | 40                 | 2                  | 11.2                | 13              | 10                               | 12.6                           | 2.78                  |                   |
| 25  | 35.3      | 40                 | 2                  | 15                  | 13              | 10                               | 12.5                           | 2.75                  |                   |
| 26  | 150       | 300                | 1                  | 12                  | 120             | 4                                | 3.5                            | 1.36                  | Ref. <sup>4</sup> |
| 27  | 400       | 300                | 1                  | 12                  | 120             | 4                                | 6.3                            | 0.92                  |                   |
| 28  | 600       | 300                | 1                  | 12                  | 120             | 4                                | 8                              | 0.78                  |                   |
| 29  | 1000      | 300                | 1                  | 12                  | 120             | 4                                | 10.5                           | 0.61                  |                   |
| 30  | 15.8      | 41.9               | 2.5                | 15                  | 0.05            | 4                                | 14.3                           | 7.38                  | Ref. <sup>5</sup> |
| 31  | 16.2      | 41.4               | 2.5                | 15                  | 0.05            | 4                                | 14.5                           | 7.21                  |                   |
| 32  | 15.2      | 39.5               | 2.5                | 15                  | 0.05            | 4                                | 14.4                           | 7.29                  |                   |
| 33  | 14.7      | 41.8               | 2.5                | 15                  | 0.05            | 4                                | 13.8                           | 7.63                  |                   |
| 34  | 15.3      | 38.2               | 2.5                | 15                  | 0.05            | 4                                | 14.7                           | 7.14                  |                   |

|    |       |      |     |     |      |    |         |       |                    |
|----|-------|------|-----|-----|------|----|---------|-------|--------------------|
| 35 | 9.5   | 200  | 2   | 10  | 28.6 | 10 | 3.2     | 13.10 | Ref. <sup>6</sup>  |
| 36 | 21    | 200  | 2   | 10  | 28.6 | 10 | 7.5     | 13.89 |                    |
| 37 | 32    | 200  | 2   | 10  | 28.6 | 10 | 11      | 13.37 |                    |
| 38 | 41    | 200  | 2   | 10  | 28.6 | 10 | 14      | 13.28 |                    |
| 39 | 54    | 200  | 2   | 10  | 28.6 | 10 | 17.5    | 12.61 |                    |
| 40 | 65    | 200  | 2   | 10  | 28.6 | 10 | 20      | 11.97 |                    |
| 41 | 77    | 200  | 2   | 10  | 28.6 | 10 | 23      | 11.62 |                    |
| 42 | 87    | 200  | 2   | 10  | 28.6 | 10 | 25.2    | 11.27 |                    |
| 43 | 95    | 200  | 2   | 10  | 28.6 | 10 | 28      | 11.46 |                    |
| 44 | 10    | 25   | 2.5 | 10  | 9    | 4  | 17.4    | 8.46  |                    |
| 45 | 20    | 25   | 2.5 | 10  | 9    | 4  | 19.8    | 4.81  |                    |
| 46 | 30    | 25   | 2.5 | 10  | 9    | 4  | 21      | 3.40  |                    |
| 47 | 40    | 25   | 2.5 | 10  | 9    | 4  | 22      | 2.67  |                    |
| 48 | 50    | 25   | 2.5 | 10  | 9    | 4  | 22.4    | 2.18  |                    |
| 49 | 50    | 31.2 | 2.5 | 10  | 9    | 4  | 20.8    | 2.52  |                    |
| 50 | 50    | 41.2 | 2.5 | 10  | 9    | 4  | 18      | 2.88  |                    |
| 51 | 50    | 62.5 | 2.5 | 10  | 9    | 4  | 15.8    | 3.84  |                    |
| 52 | 50    | 125  | 2.5 | 10  | 9    | 4  | 12.6    | 6.13  |                    |
| 53 | 30    | 50   | 2   | 19  | 9    | 4  | 2       | 0.65  | Ref. <sup>8</sup>  |
| 54 | 40    | 50   | 2   | 19  | 9    | 4  | 3       | 0.73  |                    |
| 55 | 50    | 50   | 2   | 19  | 9    | 4  | 5       | 0.97  |                    |
| 56 | 60    | 50   | 2   | 19  | 9    | 4  | 6       | 0.97  |                    |
| 57 | 27.35 | 150  | 1   | 1   | 8.1  | 4  | 3.5     | 3.73  | Ref. <sup>9</sup>  |
| 58 | 27.35 | 150  | 1   | 2.5 | 8.1  | 4  | 8.8     | 9.39  |                    |
| 59 | 27.35 | 150  | 1   | 4   | 8.1  | 4  | 10.7    | 11.41 |                    |
| 60 | 27.35 | 150  | 1   | 5.5 | 8.1  | 4  | 14      | 14.93 |                    |
| 61 | 27.35 | 150  | 1   | 7   | 8.1  | 4  | 15      | 16.00 |                    |
| 62 | 27.35 | 30   | 1   | 7   | 8.1  | 4  | 18.6    | 3.97  |                    |
| 63 | 27.35 | 50   | 1   | 7   | 8.1  | 4  | 18.4    | 6.54  |                    |
| 64 | 27.35 | 100  | 1   | 7   | 8.1  | 4  | 17.8    | 12.66 |                    |
| 65 | 27.35 | 200  | 1   | 7   | 8.1  | 4  | 10.8    | 15.36 |                    |
| 66 | 27.35 | 250  | 1   | 7   | 8.1  | 4  | 8.4     | 14.93 |                    |
| 67 | 27.35 | 300  | 1   | 7   | 8.1  | 4  | 6.7     | 14.29 |                    |
| 68 | 20    | 50   | 3   | 5.7 | 9    | 4  | 7.4     | 3.60  | Ref. <sup>10</sup> |
| 69 | 30    | 50   | 3   | 5.7 | 9    | 4  | 10.6    | 3.44  |                    |
| 70 | 40    | 50   | 3   | 5.7 | 9    | 4  | 13      | 3.16  |                    |
| 71 | 50    | 50   | 3   | 5.7 | 9    | 4  | 16      | 3.11  |                    |
| 72 | 6.38  | 43.7 | 0.5 | 6   | 9    | 4  | 2.04884 | 2.73  | Ref. <sup>11</sup> |
| 73 | 12.66 | 43.7 | 0.5 | 6   | 9    | 4  | 4.79561 | 3.22  |                    |
| 74 | 20.93 | 43.7 | 0.5 | 6   | 9    | 4  | 6.54442 | 2.66  |                    |
| 75 | 25.82 | 43.7 | 0.5 | 6   | 9    | 4  | 7.63426 | 2.51  |                    |
| 76 | 33.93 | 43.7 | 0.5 | 6   | 9    | 4  | 9.36723 | 2.35  |                    |

|     |      |      |     |    |      |     |       |       |                    |                    |
|-----|------|------|-----|----|------|-----|-------|-------|--------------------|--------------------|
| 77  | 50   | 50   | 2   | 10 | 28.6 | 9.6 | 35    | 6.74  | Ref. <sup>12</sup> |                    |
| 78  | 50   | 100  | 2   | 10 | 28.6 | 9.6 | 31    | 11.9  |                    |                    |
| 79  | 50   | 200  | 2   | 10 | 28.6 | 9.6 | 26    | 20.0  |                    |                    |
| 80  | 50   | 300  | 2   | 10 | 28.6 | 9.6 | 16    | 18.5  |                    |                    |
| 81  | 50   | 400  | 2   | 10 | 28.6 | 9.6 | 11    | 16.9  |                    |                    |
| 82  | 50   | 500  | 2   | 10 | 28.6 | 9.6 | 7     | 13.5  |                    |                    |
| 83  | 50   | 1000 | 2   | 10 | 28.6 | 9.6 | 4     | 15.4  |                    |                    |
| 84  | 50   | 2000 | 2   | 10 | 28.6 | 9.6 | 2     | 15.4  |                    |                    |
| 85  | 50   | 3000 | 2   | 10 | 28.6 | 4.6 | 0.87  | 11.6  |                    |                    |
| 86  | 9.5  | 200  | 2   | 10 | 28.6 | 4.6 | 1.74  | 7.09  |                    |                    |
| 87  | 20   | 200  | 2   | 10 | 28.6 | 4.6 | 3.5   | 6.86  |                    |                    |
| 88  | 32   | 200  | 2   | 10 | 28.6 | 4.6 | 5.98  | 7.19  |                    |                    |
| 89  | 42   | 200  | 2   | 10 | 28.6 | 4.6 | 7.89  | 7.15  |                    |                    |
| 90  | 52.1 | 200  | 2   | 10 | 28.6 | 4.6 | 8.6   | 6.31  |                    |                    |
| 91  | 61.1 | 200  | 2   | 10 | 28.6 | 4.6 | 10.13 | 6.33  |                    |                    |
| 92  | 75   | 200  | 2   | 10 | 28.6 | 4.6 | 11.75 | 6.01  |                    |                    |
| 93  | 74   | 200  | 2   | 10 | 27.1 | 9.6 | 24.34 | 12.58 |                    |                    |
| 94  | 74   | 200  | 2   | 10 | 27.1 | 6   | 21.39 | 11.04 |                    |                    |
| 95  | 74   | 200  | 2   | 10 | 27.1 | 4.6 | 20.7  | 10.72 |                    |                    |
| 96  | 74   | 200  | 2   | 10 | 27.1 | 3.8 | 24.29 | 12.56 |                    |                    |
| 97  | 10   | 25   | 3   | 10 | 9    | 4   | 16.2  | 7.88  |                    | Ref. <sup>13</sup> |
| 98  | 20   | 25   | 3   | 10 | 9    | 4   | 18.2  | 4.42  |                    |                    |
| 99  | 30   | 25   | 3   | 10 | 9    | 4   | 19.6  | 3.18  |                    |                    |
| 100 | 40   | 25   | 3   | 10 | 9    | 4   | 20.4  | 2.48  |                    |                    |
| 101 | 50   | 25   | 3   | 10 | 9    | 4   | 20.8  | 2.02  |                    |                    |
| 102 | 10   | 25   | 3.5 | 10 | 9    | 4   | 13.8  | 6.71  |                    |                    |
| 103 | 20   | 25   | 3.5 | 10 | 9    | 4   | 14.9  | 3.62  |                    |                    |
| 104 | 30   | 25   | 3.5 | 10 | 9    | 4   | 15.8  | 2.56  |                    |                    |
| 105 | 40   | 25   | 3.5 | 10 | 9    | 4   | 16.6  | 2.02  |                    |                    |
| 106 | 50   | 25   | 3.5 | 10 | 9    | 4   | 17.4  | 1.69  |                    |                    |
| 107 | 10   | 25   | 2.5 | 6  | 9    | 4   | 15.8  | 7.68  |                    |                    |
| 108 | 20   | 25   | 2.5 | 6  | 9    | 4   | 17.2  | 4.18  |                    |                    |
| 109 | 30   | 25   | 2.5 | 6  | 9    | 4   | 18.2  | 2.95  |                    |                    |
| 110 | 40   | 25   | 2.5 | 6  | 9    | 4   | 18.8  | 2.29  |                    |                    |
| 111 | 50   | 25   | 2.5 | 6  | 9    | 4   | 19.6  | 1.91  |                    |                    |
| 112 | 10   | 25   | 2.5 | 14 | 9    | 4   | 18.8  | 9.14  |                    |                    |
| 113 | 20   | 25   | 2.5 | 14 | 9    | 4   | 20.8  | 5.06  |                    |                    |
| 114 | 30   | 25   | 2.5 | 14 | 9    | 4   | 22.4  | 3.63  |                    |                    |
| 115 | 40   | 25   | 2.5 | 14 | 9    | 4   | 24.1  | 2.93  |                    |                    |
| 116 | 50   | 25   | 2.5 | 14 | 9    | 4   | 24.8  | 2.41  |                    |                    |
| 117 | 40   | 25   | 2.5 | 10 | 8    | 4   | 22.85 | 2.98  |                    |                    |
| 118 | 40   | 25   | 2.5 | 10 | 10   | 4   | 22.37 | 2.91  |                    |                    |
| 119 | 40   | 25   | 2.5 | 10 | 11   | 4   | 21.92 | 2.86  |                    |                    |

|     |     |     |     |   |      |     |       |       |                    |
|-----|-----|-----|-----|---|------|-----|-------|-------|--------------------|
| 120 | 35  | 500 | 1.8 | 9 | 23.5 | 4   | 2.65  | 7.76  | Ref. <sup>14</sup> |
| 121 | 35  | 500 | 2.3 | 9 | 23.5 | 4   | 2.07  | 6.12  |                    |
| 122 | 35  | 500 | 3.3 | 9 | 23.5 | 4   | 2.05  | 5.94  |                    |
| 123 | 35  | 105 | 1.8 | 9 | 23.5 | 4   | 9.08  | 5.55  |                    |
| 124 | 35  | 105 | 2.3 | 9 | 23.5 | 4   | 11.64 | 7.5   |                    |
| 125 | 35  | 88  | 3.3 | 9 | 23.5 | 4   | 7.6   | 4.20  |                    |
| 126 | 35  | 50  | 1.8 | 9 | 23.5 | 4   | 16.37 | 5     |                    |
| 127 | 35  | 50  | 2.3 | 9 | 23.5 | 4   | 17.97 | 5.55  |                    |
| 128 | 35  | 43  | 3.3 | 9 | 23.5 | 4   | 10.9  | 2.88  |                    |
| 129 | 35  | 25  | 1.8 | 9 | 23.5 | 4   | 28.36 | 4.16  |                    |
| 130 | 35  | 25  | 2.3 | 9 | 23.5 | 4   | 25.36 | 3.87  |                    |
| 131 | 35  | 23  | 3.3 | 9 | 23.5 | 4   | 15.79 | 2.15  |                    |
| 132 | 35  | 20  | 1.8 | 9 | 23.5 | 4   | 30.46 | 3.795 |                    |
| 133 | 35  | 20  | 2.3 | 9 | 23.5 | 4   | 29.26 | 3.6   |                    |
| 134 | 35  | 18  | 3.3 | 9 | 23.5 | 4   | 17.08 | 1.86  |                    |
| 135 | 35  | 15  | 1.8 | 9 | 23.5 | 4   | 31.76 | 2.84  |                    |
| 136 | 35  | 15  | 2.3 | 9 | 23.5 | 4   | 31.66 | 3.03  |                    |
| 137 | 35  | 15  | 3.3 | 9 | 23.5 | 4   | 19.98 | 1.74  |                    |
| 138 | 35  | 10  | 1.8 | 9 | 23.5 | 4   | 33.06 | 1.97  |                    |
| 139 | 35  | 10  | 2.3 | 9 | 23.5 | 4   | 32.25 | 1.97  |                    |
| 140 | 35  | 10  | 3.3 | 9 | 23.5 | 4   | 23.26 | 1.1   |                    |
| 141 | 40  | 444 | 1.8 | 9 | 23.5 | 9.8 | 2.89  | 7.99  |                    |
| 142 | 40  | 111 | 1.8 | 9 | 23.5 | 9.8 | 13.92 | 7.36  |                    |
| 143 | 40  | 49  | 1.8 | 9 | 23.5 | 9.8 | 19.94 | 5.43  |                    |
| 144 | 40  | 32  | 1.8 | 9 | 23.5 | 9.8 | 24.86 | 4.31  |                    |
| 145 | 40  | 25  | 1.8 | 9 | 23.5 | 9.8 | 28.66 | 3.95  |                    |
| 146 | 40  | 20  | 1.8 | 9 | 23.5 | 9.8 | 30.93 | 3.44  |                    |
| 147 | 40  | 15  | 1.8 | 9 | 23.5 | 9.8 | 32.96 | 2.74  |                    |
| 148 | 40  | 10  | 1.8 | 9 | 23.5 | 9.8 | 34.02 | 1.83  |                    |
| 149 | 15  | 50  | 1.8 | 9 | 23.5 | 9.8 | 13.1  | 7.87  |                    |
| 150 | 38  | 50  | 1.8 | 9 | 23.5 | 9.8 | 20.05 | 5.42  |                    |
| 151 | 60  | 50  | 1.8 | 9 | 23.5 | 9.8 | 24.12 | 4.25  |                    |
| 152 | 72  | 50  | 1.8 | 9 | 23.5 | 9.8 | 24.92 | 3.36  |                    |
| 153 | 96  | 50  | 1.8 | 9 | 23.5 | 9.8 | 25.19 | 2.61  |                    |
| 154 | 114 | 50  | 1.8 | 9 | 23.5 | 9.8 | 24.92 | 2.24  |                    |
| 155 | 133 | 50  | 1.8 | 9 | 23.5 | 9.8 | 25.08 | 2.22  |                    |
| 156 | 17  | 100 | 1.8 | 9 | 23.5 | 9.8 | 8.56  | 9.27  |                    |
| 157 | 40  | 100 | 1.8 | 9 | 23.5 | 9.8 | 13.86 | 7.38  |                    |
| 158 | 58  | 100 | 1.8 | 9 | 23.5 | 9.8 | 16.82 | 5.76  |                    |
| 159 | 80  | 100 | 1.8 | 9 | 23.5 | 9.8 | 18.49 | 4.98  |                    |
| 160 | 97  | 100 | 1.8 | 9 | 23.5 | 9.8 | 18.87 | 4.09  |                    |
| 161 | 113 | 100 | 1.8 | 9 | 23.5 | 9.8 | 19.64 | 3.56  |                    |
| 162 | 128 | 100 | 1.8 | 9 | 23.5 | 9.8 | 19.56 | 3.12  |                    |

|     |       |     |      |    |     |     |       |      |                    |
|-----|-------|-----|------|----|-----|-----|-------|------|--------------------|
| 163 | 20    | 25  | 8    | 10 | 12  | 4.6 | 17.46 | 2.9  | Ref. <sup>15</sup> |
| 164 | 20    | 35  | 8    | 10 | 12  | 4.6 | 18.58 | 2.21 |                    |
| 165 | 20    | 45  | 8    | 10 | 12  | 4.6 | 20.28 | 1.89 |                    |
| 166 | 20    | 55  | 8    | 10 | 12  | 4.6 | 24.5  | 1.8  |                    |
| 167 | 20    | 65  | 8    | 10 | 12  | 4.6 | 24.85 | 1.58 |                    |
| 168 | 20    | 25  | 8    | 15 | 12  | 4.6 | 17.54 | 2.91 |                    |
| 169 | 20    | 35  | 8    | 15 | 12  | 4.6 | 19.11 | 2.28 |                    |
| 170 | 20    | 45  | 8    | 15 | 12  | 4.6 | 22.55 | 2.08 |                    |
| 171 | 20    | 55  | 8    | 15 | 12  | 4.6 | 25.14 | 1.89 |                    |
| 172 | 20    | 65  | 8    | 15 | 12  | 4.6 | 25.51 | 1.63 |                    |
| 173 | 20    | 25  | 8    | 20 | 12  | 4.6 | 18.65 | 3.12 |                    |
| 174 | 20    | 35  | 8    | 20 | 12  | 4.6 | 20.65 | 2.46 |                    |
| 175 | 20    | 45  | 8    | 20 | 12  | 4.6 | 24.67 | 2.28 |                    |
| 176 | 20    | 55  | 8    | 20 | 12  | 4.6 | 26.15 | 1.97 |                    |
| 177 | 20    | 65  | 8    | 20 | 12  | 4.6 | 26.64 | 1.71 |                    |
| 178 | 20    | 30  | 5    | 21 | 14  | 4   | 12.78 | 1.65 | Ref. <sup>16</sup> |
| 179 | 20    | 50  | 5    | 21 | 14  | 4   | 15.61 | 1.22 |                    |
| 180 | 20    | 70  | 5    | 21 | 14  | 4   | 16.6  | 0.92 |                    |
| 181 | 20    | 90  | 5    | 21 | 14  | 4   | 16.03 | 0.68 |                    |
| 182 | 20    | 110 | 5    | 21 | 14  | 4   | 15.83 | 0.55 |                    |
| 183 | 40    | 150 | 2.5  | 25 | 8.8 | 4   | 3.77  | 5.33 | Ref. <sup>17</sup> |
| 184 | 60    | 150 | 2.5  | 25 | 8.8 | 4   | 4.09  | 3.33 |                    |
| 185 | 80    | 150 | 2.5  | 25 | 8.8 | 4   | 4.25  | 2.65 |                    |
| 186 | 100   | 150 | 2.5  | 25 | 8.8 | 4   | 5     | 2.5  |                    |
| 187 | 40    | 300 | 2.5  | 25 | 8.8 | 4   | 2.33  | 6.31 |                    |
| 188 | 40    | 450 | 2.5  | 25 | 8.8 | 4   | 1.68  | 7.1  |                    |
| 189 | 40    | 600 | 2.5  | 25 | 8.8 | 4   | 1.06  | 7.63 |                    |
| 190 | 34.38 | 100 | 0.25 | 40 | 10  | 3.7 | 10.69 | 6.46 | Ref. <sup>18</sup> |
| 191 | 55.73 | 100 | 0.25 | 40 | 10  | 3.7 | 15.17 | 5.67 |                    |
| 192 | 78.91 | 100 | 0.25 | 40 | 10  | 3.7 | 18.15 | 4.79 |                    |
| 193 | 101.3 | 100 | 0.25 | 40 | 10  | 3.7 | 20.24 | 4.17 |                    |
| 194 | 50    | 10  | 0.25 | 40 | 10  | 3.7 | 45.36 | 1.79 |                    |
| 195 | 50    | 20  | 0.25 | 40 | 10  | 3.7 | 51.45 | 4.15 |                    |
| 196 | 50    | 50  | 0.25 | 40 | 10  | 3.7 | 32.69 | 7.25 |                    |
| 197 | 50    | 100 | 0.25 | 40 | 10  | 3.7 | 15.14 | 5.67 |                    |
| 198 | 27    | 20  | 0.25 | 40 | 10  | 3.7 | 43.46 | 6.64 |                    |
| 199 | 51.5  | 20  | 0.25 | 40 | 10  | 3.7 | 51.47 | 4.16 |                    |
| 200 | 73.6  | 20  | 0.25 | 40 | 10  | 3.7 | 50.97 | 2.89 |                    |
| 201 | 90.7  | 20  | 0.25 | 40 | 10  | 3.7 | 48.11 | 2.14 |                    |
| 202 | 20.8  | 50  | 0.25 | 40 | 10  | 3.7 | 19.15 | 9.44 |                    |
| 203 | 46.8  | 50  | 0.25 | 40 | 10  | 3.7 | 32.58 | 7.25 |                    |
| 204 | 73.8  | 50  | 0.25 | 40 | 10  | 3.7 | 37.54 | 5.29 |                    |
| 205 | 94.5  | 50  | 0.25 | 40 | 10  | 3.7 | 38.68 | 4.25 |                    |

|     |      |     |       |    |      |    |       |       |                    |
|-----|------|-----|-------|----|------|----|-------|-------|--------------------|
| 206 | 30   | 20  | 1.5   | 8  | 7.1  | 4  | 10.09 | 1.41  | Ref. <sup>19</sup> |
| 207 | 30   | 40  | 1.5   | 8  | 7.1  | 4  | 7.08  | 1.99  |                    |
| 208 | 30   | 60  | 1.5   | 8  | 7.1  | 4  | 5.51  | 2.32  |                    |
| 209 | 30   | 80  | 1.5   | 8  | 7.1  | 4  | 4.53  | 2.55  |                    |
| 210 | 30   | 100 | 1.5   | 8  | 7.1  | 4  | 4     | 2.8   |                    |
| 211 | 100  | 50  | 4.5   | 10 | 23.5 | 10 | 11    | 1.87  | Ref. <sup>20</sup> |
| 212 | 100  | 192 | 4.5   | 10 | 23.5 | 10 | 5.27  | 3.22  |                    |
| 213 | 100  | 50  | 1.23  | 10 | 23.5 | 10 | 30.17 | 4.69  |                    |
| 214 | 100  | 50  | 0.705 | 10 | 23.5 | 10 | 35.5  | 5.52  |                    |
| 215 | 100  | 50  | 0.455 | 10 | 23.5 | 10 | 50.59 | 7.87  |                    |
| 216 | 100  | 50  | 0.268 | 10 | 23.5 | 10 | 53.58 | 8.33  |                    |
| 217 | 0.5  | 30  | 6     | 12 | 0.05 | 4  | 1.21  | 14.12 | Ref. <sup>21</sup> |
| 218 | 1    | 30  | 6     | 12 | 0.05 | 4  | 2.91  | 16.97 |                    |
| 219 | 1.4  | 30  | 6     | 12 | 0.05 | 4  | 5.3   | 22.09 |                    |
| 220 | 1.8  | 30  | 6     | 12 | 0.05 | 4  | 6.24  | 20.23 |                    |
| 221 | 2.2  | 30  | 6     | 12 | 0.05 | 4  | 7.44  | 19.73 |                    |
| 222 | 0.63 | 30  | 4.5   | 11 | 0.05 | 4  | 2.4   | 22.23 | Ref. <sup>22</sup> |
| 223 | 0.89 | 30  | 4.5   | 11 | 0.05 | 4  | 3.06  | 20.06 |                    |
| 224 | 1.1  | 30  | 4.5   | 11 | 0.05 | 4  | 4.25  | 22.54 |                    |
| 225 | 1.3  | 30  | 4.5   | 11 | 0.05 | 4  | 5.2   | 23.34 |                    |
| 226 | 10   | 20  | 0.6   | 8  | 18   | 4  | 9.27  | 3.59  | Ref. <sup>23</sup> |
| 227 | 15   | 20  | 0.6   | 8  | 18   | 4  | 14.54 | 3.58  |                    |
| 228 | 20   | 20  | 0.6   | 8  | 18   | 4  | 14.32 | 2.7   |                    |
| 229 | 25   | 20  | 0.6   | 8  | 18   | 4  | 14.38 | 2.18  |                    |
| 230 | 14.5 | 10  | 4     | 8  | 8.8  | 4  | 13.08 | 1.91  | Ref. <sup>24</sup> |
| 231 | 14.5 | 20  | 4     | 8  | 8.8  | 4  | 10.88 | 3.11  |                    |
| 232 | 14.5 | 30  | 4     | 8  | 8.8  | 4  | 8.95  | 3.8   |                    |
| 233 | 14.5 | 40  | 4     | 8  | 8.8  | 4  | 8.72  | 5     |                    |
| 234 | 14.5 | 50  | 4     | 8  | 8.8  | 4  | 7.45  | 5.39  |                    |
| 235 | 8    | 60  | 2.5   | 15 | 0.05 | 4  | 6.7   | 9.77  | Ref. <sup>25</sup> |
| 236 | 8    | 45  | 2.5   | 15 | 0.05 | 4  | 8.22  | 8.99  |                    |
| 237 | 8    | 35  | 2.5   | 15 | 0.05 | 4  | 9.58  | 8.15  |                    |
| 238 | 8    | 30  | 2.5   | 15 | 0.05 | 4  | 10.51 | 7.67  |                    |
| 239 | 8    | 25  | 2.5   | 15 | 0.05 | 4  | 12.96 | 7.88  |                    |
| 240 | 8    | 24  | 2.5   | 15 | 0.05 | 4  | 10.87 | 6.34  |                    |
| 241 | 8    | 17  | 2.5   | 15 | 0.05 | 4  | 15.22 | 6.29  |                    |
| 242 | 8    | 15  | 2.5   | 15 | 0.05 | 4  | 13.93 | 5.08  |                    |
| 243 | 10   | 15  | 2.5   | 15 | 0.05 | 4  | 17.27 | 5.04  |                    |
| 244 | 14   | 15  | 2.5   | 15 | 0.05 | 4  | 17.29 | 3.60  |                    |
| 245 | 20   | 15  | 2.5   | 15 | 0.05 | 4  | 21.72 | 3.17  |                    |

|     |       |        |       |    |    |     |       |      |                    |
|-----|-------|--------|-------|----|----|-----|-------|------|--------------------|
| 246 | 10    | 20     | 1     | 20 | 40 | 4   | 11.89 | 4.63 | Ref. <sup>26</sup> |
| 247 | 20    | 20     | 1     | 20 | 40 | 4   | 17.23 | 3.35 |                    |
| 248 | 30    | 20     | 1     | 20 | 40 | 4   | 19.85 | 2.57 |                    |
| 249 | 40    | 20     | 1     | 20 | 40 | 4   | 21.62 | 2.10 |                    |
| 250 | 50    | 20     | 1     | 20 | 40 | 4   | 22.05 | 1.72 |                    |
| 251 | 30    | 11.52  | 0.268 | 10 | 3  | 10  | 33.34 | 2.68 | Ref. <sup>27</sup> |
| 252 | 30    | 19.35  | 0.455 | 10 | 3  | 10  | 30    | 3.67 |                    |
| 253 | 30    | 29.53  | 0.705 | 10 | 3  | 10  | 18    | 3.55 |                    |
| 254 | 30    | 50     | 1.23  | 10 | 3  | 10  | 12.8  | 4.38 |                    |
| 255 | 30    | 150.18 | 4.705 | 10 | 3  | 10  | 4.3   | 4.46 |                    |
| 256 | 30    | 50     | 0.268 | 10 | 3  | 10  | 12.51 | 4.38 |                    |
| 257 | 30    | 50     | 0.455 | 10 | 3  | 10  | 13.43 | 4.7  |                    |
| 258 | 30    | 50     | 0.705 | 10 | 3  | 10  | 13.47 | 4.71 |                    |
| 259 | 30    | 50     | 4.705 | 10 | 3  | 10  | 8.06  | 2.82 |                    |
| 260 | 30    | 2      | 0.455 | 10 | 3  | 10  | 53.53 | 0.75 |                    |
| 261 | 30    | 2.6    | 0.455 | 10 | 3  | 10  | 54.32 | 0.94 |                    |
| 262 | 30    | 3      | 0.455 | 10 | 3  | 10  | 54.49 | 1.15 |                    |
| 263 | 30    | 3.57   | 0.455 | 10 | 3  | 10  | 53.12 | 1.28 |                    |
| 264 | 30    | 5      | 0.455 | 10 | 3  | 10  | 50.66 | 1.83 |                    |
| 265 | 30    | 7.5    | 0.455 | 10 | 3  | 10  | 47.74 | 2.5  |                    |
| 266 | 30    | 10     | 0.455 | 10 | 3  | 10  | 39.32 | 2.87 |                    |
| 267 | 30    | 30     | 0.455 | 10 | 3  | 10  | 21.61 | 4.61 |                    |
| 268 | 30    | 40     | 0.455 | 10 | 3  | 10  | 16.4  | 4.68 |                    |
| 269 | 22.30 | 100    | 1.05  | 10 | 45 | 9.6 | 6.09  | 5.31 |                    |
| 270 | 22.68 | 80     | 1.05  | 10 | 45 | 9.6 | 7.58  | 5.20 |                    |
| 271 | 22.14 | 60     | 1.05  | 10 | 45 | 9.6 | 9.59  | 5.05 |                    |
| 272 | 21.70 | 40     | 1.05  | 10 | 45 | 9.6 | 13.27 | 4.76 |                    |
| 273 | 12.06 | 20     | 1.05  | 10 | 45 | 9.6 | 13.96 | 4.50 |                    |
| 274 | 17.72 | 20     | 1.05  | 10 | 45 | 9.6 | 19.18 | 4.21 |                    |
| 275 | 21.97 | 20     | 1.05  | 10 | 45 | 9.6 | 22.03 | 3.90 |                    |
| 276 | 26.64 | 20     | 1.05  | 10 | 45 | 9.6 | 23.07 | 3.37 |                    |
| 277 | 30.66 | 20     | 1.05  | 10 | 45 | 9.6 | 24.70 | 3.13 |                    |
| 278 | 22.98 | 100    | 1.05  | 10 | 45 | 9.6 | 6.29  | 5.33 |                    |
| 279 | 22.76 | 80     | 1.05  | 10 | 45 | 9.6 | 7.67  | 5.24 |                    |
| 280 | 22.41 | 60     | 1.05  | 10 | 45 | 9.6 | 9.60  | 5.00 |                    |
| 281 | 22.43 | 40     | 1.05  | 10 | 45 | 9.6 | 13.37 | 4.64 |                    |
| 282 | 12.92 | 20     | 1.05  | 10 | 45 | 9.6 | 14.84 | 4.47 |                    |
| 283 | 17.78 | 20     | 1.05  | 10 | 45 | 9.6 | 19.59 | 4.29 |                    |
| 284 | 21.99 | 20     | 1.05  | 10 | 45 | 9.6 | 21.90 | 3.87 |                    |
| 285 | 25.89 | 20     | 1.05  | 10 | 45 | 9.6 | 24.16 | 3.63 |                    |
| 286 | 29.87 | 20     | 1.05  | 10 | 45 | 9.6 | 26.05 | 3.39 |                    |
| 287 | 18.88 | 100    | 0.8   | 10 | 45 | 9.6 | 5.54  | 5.71 |                    |
| 288 | 18.37 | 80     | 0.8   | 10 | 45 | 9.6 | 7.11  | 6.02 |                    |
| 289 | 17.71 | 60     | 0.8   | 10 | 45 | 9.6 | 8.60  | 5.66 | Ref. <sup>28</sup> |

|     |       |     |     |     |    |     |       |      |
|-----|-------|-----|-----|-----|----|-----|-------|------|
| 290 | 6.12  | 20  | 0.8 | 10  | 45 | 9.6 | 2.22  | 1.41 |
| 291 | 17.10 | 40  | 0.8 | 10  | 45 | 9.6 | 11.93 | 5.43 |
| 292 | 14.10 | 20  | 0.8 | 10  | 45 | 9.6 | 13.72 | 3.79 |
| 293 | 17.97 | 20  | 0.8 | 10  | 45 | 9.6 | 18.67 | 4.04 |
| 294 | 22.99 | 20  | 0.8 | 10  | 45 | 9.6 | 25.36 | 4.29 |
| 295 | 26.15 | 20  | 0.8 | 10  | 45 | 9.6 | 25.37 | 3.77 |
| 296 | 18.14 | 100 | 0.8 | 10  | 45 | 9.6 | 5.48  | 5.88 |
| 297 | 17.67 | 80  | 0.8 | 10  | 45 | 9.6 | 6.62  | 5.83 |
| 298 | 16.75 | 60  | 0.8 | 10  | 45 | 9.6 | 8.00  | 5.57 |
| 299 | 8.03  | 20  | 0.8 | 10  | 45 | 9.6 | 10.51 | 5.09 |
| 300 | 16.77 | 40  | 0.8 | 10  | 45 | 9.6 | 11.86 | 5.50 |
| 301 | 15.20 | 20  | 0.8 | 10  | 45 | 9.6 | 16.21 | 4.15 |
| 302 | 17.91 | 20  | 0.8 | 10  | 45 | 9.6 | 20.94 | 4.55 |
| 303 | 20.86 | 20  | 0.8 | 10  | 45 | 9.6 | 22.84 | 4.26 |
| 304 | 24.70 | 20  | 0.8 | 10  | 45 | 9.6 | 25.79 | 4.06 |
| 305 | 24.86 | 100 | 1.3 | 10  | 45 | 9.6 | 6.47  | 5.06 |
| 306 | 24.74 | 80  | 1.3 | 10  | 45 | 9.6 | 7.85  | 4.94 |
| 307 | 23.58 | 60  | 1.3 | 10  | 45 | 9.6 | 9.84  | 4.87 |
| 308 | 23.68 | 40  | 1.3 | 10  | 45 | 9.6 | 13.72 | 4.51 |
| 309 | 13.76 | 20  | 1.3 | 10  | 45 | 9.6 | 14.02 | 3.96 |
| 310 | 18.81 | 20  | 1.3 | 10  | 45 | 9.6 | 19.32 | 4.00 |
| 311 | 23.44 | 20  | 1.3 | 10  | 45 | 9.6 | 21.42 | 3.55 |
| 312 | 27.12 | 20  | 1.3 | 10  | 45 | 9.6 | 23.58 | 3.38 |
| 313 | 31.28 | 20  | 1.3 | 10  | 45 | 9.6 | 25.59 | 3.18 |
| 314 | 22.91 | 100 | 1.3 | 10  | 45 | 9.6 | 6.15  | 5.22 |
| 315 | 22.77 | 80  | 1.3 | 10  | 45 | 9.6 | 7.59  | 5.18 |
| 316 | 22.85 | 60  | 1.3 | 10  | 45 | 9.6 | 9.60  | 4.90 |
| 317 | 22.65 | 40  | 1.3 | 10  | 45 | 9.6 | 13.40 | 4.60 |
| 318 | 13.32 | 20  | 1.3 | 10  | 45 | 9.6 | 14.78 | 4.31 |
| 319 | 18.04 | 20  | 1.3 | 10  | 45 | 9.6 | 18.96 | 4.09 |
| 320 | 22.60 | 20  | 1.3 | 10  | 45 | 9.6 | 21.71 | 3.74 |
| 321 | 26.22 | 20  | 1.3 | 10  | 45 | 9.6 | 23.37 | 3.47 |
| 322 | 30.81 | 20  | 1.3 | 10  | 45 | 9.6 | 24.86 | 3.14 |
| 323 | 27.94 | 100 | 1.3 | 7.5 | 45 | 9.6 | 7.14  | 4.97 |
| 324 | 27.28 | 80  | 1.3 | 7.5 | 45 | 9.6 | 8.46  | 4.83 |
| 325 | 26.71 | 60  | 1.3 | 7.5 | 45 | 9.6 | 10.72 | 4.68 |
| 326 | 26.50 | 40  | 1.3 | 7.5 | 45 | 9.6 | 14.65 | 4.30 |
| 327 | 18.13 | 20  | 1.3 | 7.5 | 45 | 9.6 | 12.77 | 2.74 |
| 328 | 21.76 | 20  | 1.3 | 7.5 | 45 | 9.6 | 21.03 | 3.76 |
| 329 | 26.62 | 20  | 1.3 | 7.5 | 45 | 9.6 | 23.16 | 3.38 |
| 330 | 30.97 | 20  | 1.3 | 7.5 | 45 | 9.6 | 24.77 | 3.11 |
| 331 | 34.53 | 20  | 1.3 | 7.5 | 45 | 9.6 | 24.88 | 2.80 |
| 332 | 25.86 | 100 | 1.3 | 7.5 | 45 | 9.6 | 6.76  | 5.08 |
| 333 | 25.60 | 80  | 1.3 | 7.5 | 45 | 9.6 | 8.25  | 5.01 |

|     |       |     |     |     |    |     |       |      |
|-----|-------|-----|-----|-----|----|-----|-------|------|
| 334 | 25.14 | 60  | 1.3 | 7.5 | 45 | 9.6 | 10.49 | 4.87 |
| 335 | 25.38 | 40  | 1.3 | 7.5 | 45 | 9.6 | 14.72 | 4.51 |
| 336 | 16.26 | 20  | 1.3 | 7.5 | 45 | 9.6 | 11.16 | 2.67 |
| 337 | 20.59 | 20  | 1.3 | 7.5 | 45 | 9.6 | 19.14 | 3.62 |
| 338 | 25.59 | 20  | 1.3 | 7.5 | 45 | 9.6 | 22.97 | 3.49 |
| 339 | 29.72 | 20  | 1.3 | 7.5 | 45 | 9.6 | 24.03 | 3.14 |
| 340 | 34.40 | 20  | 1.3 | 7.5 | 45 | 9.6 | 25.22 | 2.85 |
| 341 | 30.18 | 100 | 1.3 | 5   | 45 | 9.6 | 7.29  | 4.70 |
| 342 | 30.39 | 80  | 1.3 | 5   | 45 | 9.6 | 8.83  | 4.52 |
| 343 | 29.41 | 60  | 1.3 | 5   | 45 | 9.6 | 11.21 | 4.45 |
| 344 | 29.24 | 40  | 1.3 | 5   | 45 | 9.6 | 15.06 | 4.01 |
| 345 | 19.19 | 20  | 1.3 | 5   | 45 | 9.6 | 19.27 | 3.91 |
| 346 | 24.51 | 20  | 1.3 | 5   | 45 | 9.6 | 21.73 | 3.45 |
| 347 | 29.89 | 20  | 1.3 | 5   | 45 | 9.6 | 23.19 | 3.02 |
| 348 | 34.40 | 20  | 1.3 | 5   | 45 | 9.6 | 23.83 | 2.69 |
| 349 | 38.84 | 20  | 1.3 | 5   | 45 | 9.6 | 21.06 | 2.11 |
| 350 | 28.61 | 100 | 1.3 | 5   | 45 | 9.6 | 7.21  | 4.90 |
| 351 | 28.21 | 80  | 1.3 | 5   | 45 | 9.6 | 8.59  | 4.74 |
| 352 | 27.93 | 60  | 1.3 | 5   | 45 | 9.6 | 10.84 | 4.53 |
| 353 | 27.31 | 40  | 1.3 | 5   | 45 | 9.6 | 14.76 | 4.21 |
| 354 | 18.68 | 20  | 1.3 | 5   | 45 | 9.6 | 18.38 | 3.83 |
| 355 | 22.85 | 20  | 1.3 | 5   | 45 | 9.6 | 21.01 | 3.58 |
| 356 | 27.78 | 20  | 1.3 | 5   | 45 | 9.6 | 22.95 | 3.21 |
| 357 | 31.83 | 20  | 1.3 | 5   | 45 | 9.6 | 24.09 | 2.94 |
| 358 | 37.89 | 20  | 1.3 | 5   | 45 | 9.6 | 25.65 | 2.63 |

Note:

(1) We recalculated some reported results from the literature to ensure uniformity for our ML model development. Specific example is standardization of Specific Energy Input (SEI): several studies showed only the SEI value in the figure, defined as the ratio of power to gas flow rate.<sup>14,25</sup> If the authors provided either the SEI along with the power or the flow rate, we used this information to recalculate the missing parameter to standardize the data.

(2) When the dielectric barrier material was identified as alumina or quartz in each study but its relative permittivity was not explicitly reported, we assigned a value of 10 for alumina and 4 for quartz, based on typical values cited in Ref.<sup>1</sup>

### S3. Hyperparameters optimization - Bayesian Optimization

Hyperparameters are predefined configurations that govern a model’s learning behavior and overall effectiveness. A Bayesian Optimization (BO) framework was employed to systematically search for optimal hyperparameters across three supervised learning (SL) algorithms: Physics-informed neural network (PINN), Random Forest (RF), and Xtreme Gradient Boost (XGB). The objective was to maximize test performance of models, as measured by the  $R^2$  score.

BO is a sequential, model-based tuning strategy built on two core components: a probabilistic surrogate model and an acquisition function.<sup>29</sup> Gaussian Process

Regression (GPR) served as the surrogate model, using an initial set of hyperparameter samples to estimate both the expected  $R^2$  and the associated uncertainty across the search space. These predictions guide the acquisition function, which strategically balances exploration of under-sampled regions with exploitation of areas known to yield high performance. At each iteration, the algorithm selects the hyperparameter set that maximizes this function, progressively refining its approximations as more samples are evaluated. This process continues until convergence toward near-optimal configurations.<sup>30</sup>

For the PINN, architectural hyperparameters, including the number of hidden layers, neurons per layer, and activation function, were optimized within predefined ranges. The RF model's tuning involved key parameters such as the number of estimators, maximum depth, maximum features, minimum samples split, and minimum samples leaf. For the XGB model, the optimization encompassed learning rate, subsample ratio, colsample\_bytree, L1 and L2 regularization terms (reg\_alpha and reg\_lambda), minimum child weight, and gamma. All hyperparameters not explicitly listed in the optimization process were kept at their default values. The finalized hyperparameters Group 5-fold Cross-Validation (CV) framework and random 5-fold CV framework, along with their respective search ranges and selected values, are summarized in Table S3 and Table S4, respectively.

Table S3. Hyperparameters of SL models and optimized ranges under Group 5-fold CV framework.

| SL models | Hyperparameter      | Optimization range                   | Optimized values in each fold |              |             |              |             |
|-----------|---------------------|--------------------------------------|-------------------------------|--------------|-------------|--------------|-------------|
|           |                     |                                      | 1                             | 2            | 3           | 4            | 5           |
| PINN      | Hidden layer        | [2, 3, 4]                            | 3                             |              |             |              |             |
|           | Neurons per layer   | [5, 60]                              | (12, 5, 5)                    | (45, 38, 20) | (53, 6, 31) | (33, 42, 36) | (10, 26, 5) |
|           | Activation function | tanh, ReLU, logistic                 | ReLU                          |              |             |              |             |
| RF        | N_estimators        | [100, 1000]                          | 100                           | 543          | 458         | 100          | 100         |
|           | Max_depth           | [None, 5, 8, 10, 12, 15, 20, 25, 30] | 12                            | 8            | 5           | 15           | 5           |
|           | Max_features        | [0.3, 1]                             | 0.713                         | 0.927        | 1.000       | 0.400        | 1.000       |
|           | Min_samples_split   | [2, 20]                              | 2                             | 5            | 2           | 2            | 2           |
|           | Min_samples_leaf    | [1, 10]                              | 4                             | 2            | 10          | 1            | 1           |
| XGB       | N_estimators        | [100, 1000]                          | 706                           | 1000         | 1000        | 1000         | 1000        |
|           | Max_depth           | [3, 10]                              | 10                            | 3            | 10          | 10           | 10          |
|           | Learning_rate       | [0.005, 0.3]                         | 0.005                         | 0.086        | 0.3         | 0.21         | 0.005       |
|           | Subsample           | [0.6, 1]                             | 0.6                           | 1.0          | 0.6         | 0.76         | 0.6         |
|           | Colsample_bytree    | [0.6, 1]                             | 1.0                           | 0.6          | 1.0         | 0.70         | 1.0         |
|           | Reg_lambda          | [0.01, 100]                          | 100                           | 0.959        | 0.01        | 0.024        | 0.01        |
|           | Reg_alpha           | [0.001, 10]                          | 0.001                         |              |             |              |             |
|           | Min_child_weight    | [1, 20]                              | 2                             | 4            | 1           | 4            | 1           |
| Gamma     | [0, 5]              | 0.0                                  | 0.735                         | 5.0          | 0.03        | 5.0          |             |

Table S4. Hyperparameters of SL models and optimized ranges under 5-fold CV framework.

| SL models | Hyperparameter    | Optimization range                   | Optimized value |
|-----------|-------------------|--------------------------------------|-----------------|
| PINN      | Hidden layer      | [2, 3, 4]                            | 3               |
|           | Neurons per layer | [2, 100]                             | (60, 21, 40)    |
|           | Activation        | tanh, ReLU, logistic                 | ReLU            |
| RF        | N_estimators      | [100, 1000]                          | 1000            |
|           | Max_depth         | [None, 5, 8, 10, 12, 15, 20, 25, 30] | None            |
|           | Max_features      | [0.3, 1]                             | 0.3             |
|           | Min_samples_split | [2, 20]                              | 2               |
|           | Min_samples_leaf  | [1, 10]                              | 1               |
| XGB       | N_estimators      | [100, 1000]                          | 1000            |
|           | Max_depth         | [3, 10]                              | 10              |
|           | Learning_rate     | [0.005, 0.3]                         | 0.3             |
|           | Subsample         | [0.6, 1]                             | 0.6             |
|           | Colsample_bytree  | [0.6, 1]                             | 1               |
|           | Reg_lambda        | [0.01, 100]                          | 100             |
|           | Reg_alpha         | [0.001, 10]                          | 0.001           |
|           | Min_child_weight  | [1, 20]                              | 1               |
| Gamma     | [0, 5]            | 0.00                                 |                 |

#### S4. Training curves of supervised learning models

As depicted in Fig. S1, the training process for PINN model and XGB model exhibits a steady decline in mean squared error (MSE) under the Group 5-fold cross-validation (CV) framework. Following loss computation, the backpropagation (BP) algorithm employs the chain rule to compute the partial derivatives of the error with respect to each network weight. These gradients subsequently guide gradient descent in iteratively updating the model parameters toward an optimal solution.

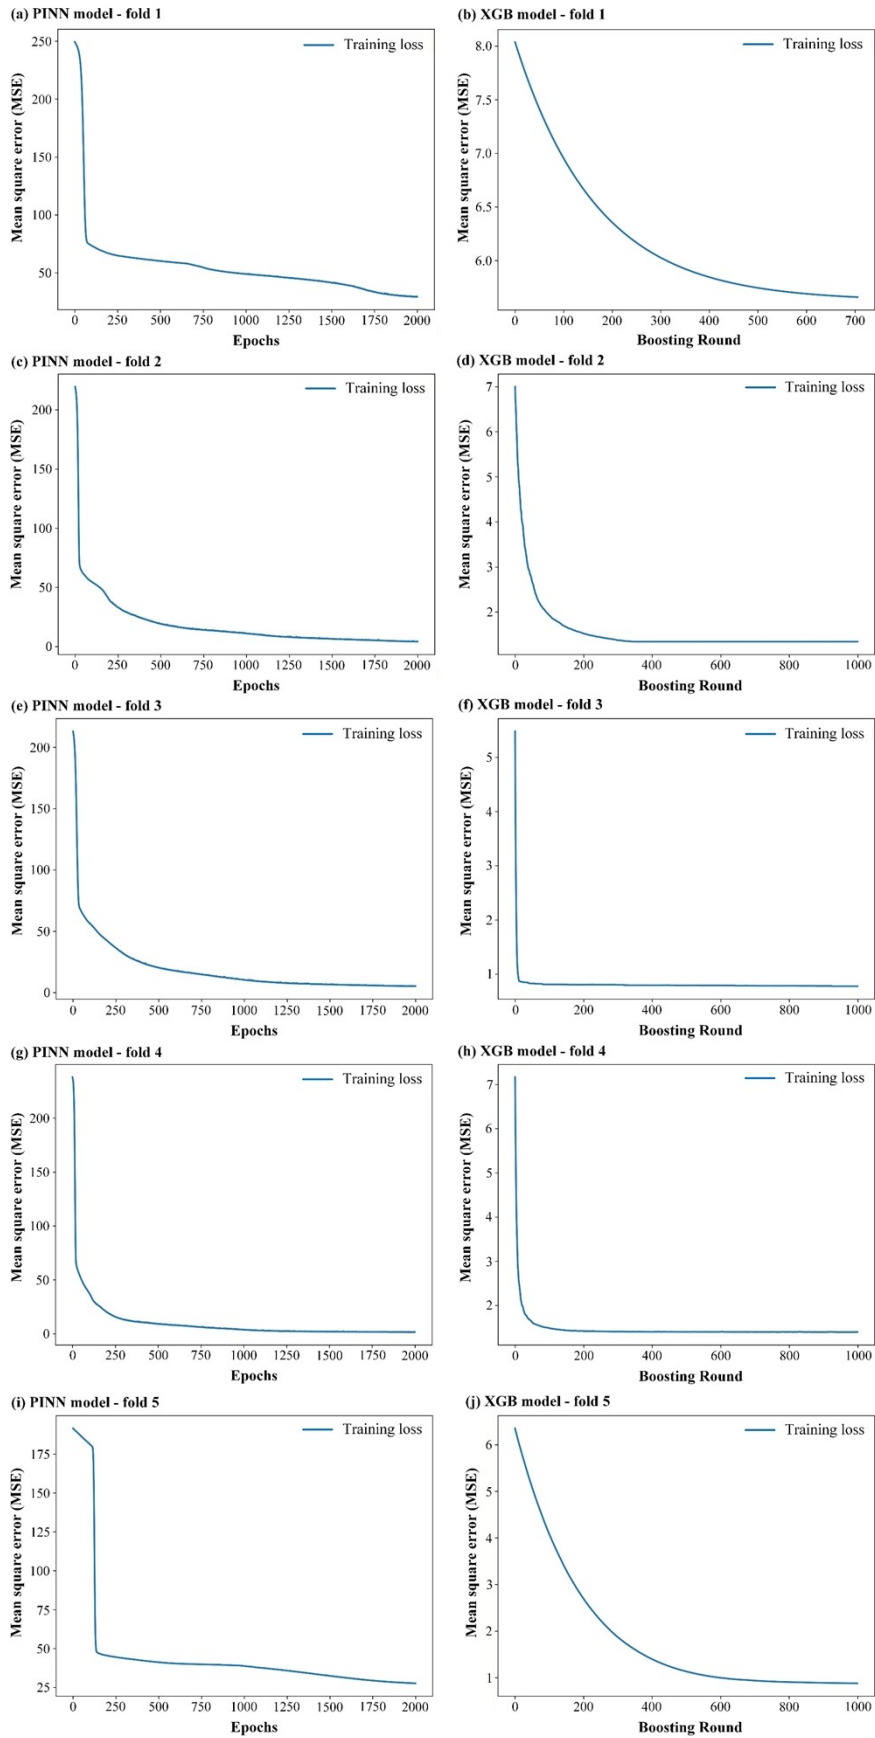

Fig. S1. MSE of the best fitness value in each epoch and boosting round for the PINN model and XGB model within the (a, b) Fold 1, (c, d) Fold 2, (e, f) Fold 3, (g, h) Fold 4, and (i, j) Fold 5.

## S5. Experimental setup

The ML model was developed using datasets compiled from the literature, and its generalizability was subsequently validated against experimental data obtained in this study. A schematic overview of the experimental setup is provided in Fig. S3.<sup>31</sup> The dielectric barrier discharge reactor consists of an alumina tube with a fixed outer diameter of 8.6 mm. A stainless-steel sheet (100 mm in length) was wrapped around the tube and grounded through a 100 nF capacitor. The inner electrode was a stainless-steel rod with diameters of 6.5 mm and 7.0 mm, corresponding to discharge gaps of 1.05 mm and 0.8 mm, respectively. This electrode was connected to an AC high-voltage power supply (AFS G155–150K) operating at a fixed frequency of 45 kHz. Voltage and charge waveforms were captured using a four-channel oscilloscope (PicoScope 3405D, 100 MHz bandwidth, 8-bit resolution, 1 G/s sampling rate). The applied voltage across the reactor was measured with a 1:1000 high-voltage probe (Tektronix P6015A), while the charge transferred during plasma discharge was determined by monitoring the voltage across the 100 nF capacitor using a 1:10 probe (Pico TA 131). Discharge power was calculated from the acquired voltage and charge waveforms using the Lissajous figure method.<sup>13</sup>

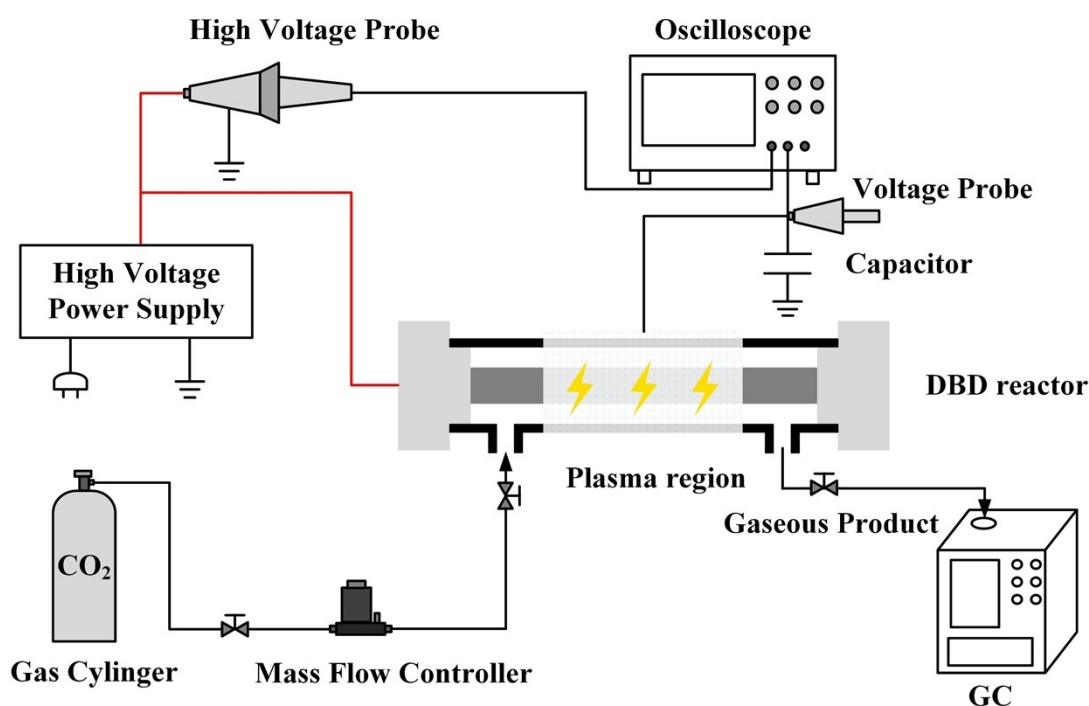

Fig. S2. Schematic overview of the experimental setup.

## S6. References

- 1 David RL, CRC Handbook of chemistry and physics. CRC Press, New York, 1999.
- 2 S. Paulussen, B. Verheyde, X. Tu, C. De Bie, T. Martens, D. Petrovic, A. Bogaerts and B. Sels, *Plasma Sources Sci. Technol.*, 2010, **19**, 34015.
- 3 Q. Yu, M. Kong, T. Liu, J. Fei and X. Zheng, *Plasma Chem. Plasma Process.*, 2012, **32**, 153–163.
- 4 N. Lisi, U. Pasqual Laverdura, R. Chierchia, I. Luisetto and S. Stendardo, *Sci. Rep.*, 2023, **13**, 7394.
- 5 D. Mei, Y.-L. He, S. Liu, J. Yan and X. Tu, *Plasma Process. Polym.*, 2016, **13**, 544–556.
- 6 A. Ozkan, T. Dufour, T. Silva, N. Britun, R. Snyders, A. Bogaerts and F. Reniers, *Plasma Sources Sci. Technol.*, 2016, **25**, 25013.
- 7 M. Alliat, D. Mei and X. Tu, *J. CO2 Util.*, 2018, **27**, 308–319.
- 8 N. Lu, C. Zhang, K. Shang, N. Jiang, J. Li and Y. Wu, *J. Phys. D: Appl. Phys.*, 2019, **52**, 224003.
- 9 G. Niu, Y. Qin, W. Li and Y. Duan, *Plasma Chem. Plasma Process.*, 2019, **39**, 809–824.
- 10 D. Mei, X. Zhu, Y.-L. He, J. D. Yan and X. Tu, *Plasma Sources Sci. Technol.*, 2014, **24**, 15011.
- 11 B. Wang, X. Wang and B. Zhang, *Front. Chem. Sci. Eng.*, 2021, **15**, 687–697.
- 12 A. Ozkan, A. Bogaerts and F. Reniers, *J. Phys. D: Appl. Phys.*, 2017, **50**, 84004.
- 13 D. Mei and X. Tu, *J. CO2 Util.*, 2017, **19**, 68–78.
- 14 R. Aerts, W. Somers and A. Bogaerts, *ChemSusChem*, 2015, **8**, 702–716.
- 15 A. Zhou, D. Chen, C. Ma, F. Yu and B. Dai, *Catalysts*, 2018, **8**, 256.
- 16 J. Li, S. Zhu, K. Lu, C. Ma, D. Yang and F. Yu, *J. Environ. Chem. Eng.*, 2021, **9**, 104654.
- 17 L. He, X. Yue, X. Liu and Z. Wu, *J. Phys. D: Appl. Phys.*, 2025, **58**, 105204.
- 18 H. Yukio, P. Emeraldi, T. Imai and S. Kambara, *Int. J. Plasma Environ. Sci. Technol.*, 2023, **17**, e01007.
- 19 P. Wu, X. Li, N. Ullah and Z. Li, *Mole. Catal.*, 2021, **499**, 111304.
- 20 I. Michielsen, Y. Uytendhouwen, J. Pype, B. Michielsen, J. Mertens, F. Reniers, V. Meynen and A. Bogaerts, *Chem. Eng. J.*, 2017, **326**, 477–488.
- 21 D. Ray, P. Chawdhury, K. V. S. S. Bhargavi, S. Thatikonda, N. Lingaiah and Ch. Subrahmanyam, *J. CO2 Util.*, 2021, **44**, 101400.
- 22 M. Umamaheswara Rao, K. Bhargavi, G. Madras and Ch. Subrahmanyam, *Chem. Eng. J.*, 2023, **468**, 143671.
- 23 X. Duan, Z. Hu, Y. Li and B. Wang, *AIChE J.*, 2015, **61**, 898–903.
- 24 M. Xia, W. Ding, C. Shen, Z. Zhang and C. Liu, *Ind. Eng. Chem. Res.*, 2022, **61**, 10455–10460.
- 25 D. Mei, X. Zhu, C. Wu, B. Ashford, P. T. Williams and X. Tu, *Appl. Catal. B: Environ.*, 2016, **182**, 525–532.
- 26 Y. Gao, R. Zhou, B. Chen, L. Xiao, X. Zhao, J. Sun, R. Zhou, J. Zhang and Z. Liu, *ACS Sustainable Chem. Eng.*, 2024, **12**, 10993–11005.
- 27 Y. Uytendhouwen, S. Van Alphen, I. Michielsen, V. Meynen, P. Cool and A. Bogaerts, *Chem. Eng. J.*, 2018, **348**, 557–568.
- 28 J. Li, G. Palma, J. Xu, F. Gallucci, A. Bogaerts and S. Li, *Energy Convers. Manage.* 2026, **356**, 121210.
- 29 B. Hickish, D. I. Fletcher and R. F. Harrison, *Int. J. Rail Transp.*, 2020, **8**, 307–323.
- 30 S. Greenhill, S. Rana, S. Gupta, P. Vellanki and S. Venkatesh, *IEEE Access*, 2020, **8**, 13937–13948.

31 R. Vertongen, G. De Felice, H. van den Bogaard, F. Gallucci, A. Bogaerts and S. Li, *ACS Sustainable Chem. Eng.*, 2024, **12**, 10841–10853.
